# Supplementary material
Source: publisher site journal article supplement (https://static.cambridge.org/content/id/urn:cambridge.org:id:article:S0899823X20013094/resource/name/S0899823X20013094supp001.pdf)
Supplement: Supplementary file 1 [file S0899823X20013094supp001.pdf]

**Infection Control & Hospital Epidemiology****Date of delivery:****Journal and vol/article ref:**

ice

2001309

**Number of pages (not including this page): 2**

This proof is sent to you on behalf of Cambridge University Press. Please review the proofs carefully and use the Adobe annotation tools to convey and mark-up edits. Please ensure you answer all queries.

Please EMAIL your annotated PDF within **2** days of receipt to:

**Brian Mazeski (iceproduction@cambridge.org)**

**Authors are strongly advised to read these proofs thoroughly because any errors missed may appear in the final published paper. This will be your ONLY chance to correct your proof. Once published, either online or in print, no further changes can be made.**

**NOTE:** If you have no corrections to make, please also email to authorise publication.

- The proof is sent to you for correction of typographical errors only. Revision of the substance of the text is not permitted, unless discussed with the editor of the journal. Only **one** set of corrections are permitted.
- Please answer carefully any author queries.
- Corrections which do NOT follow journal style will not be accepted.
- A new copy of a figure must be provided if correction of anything other than a typographical error introduced by the typesetter is required.

To order reprints or offprints of your article or a printed copy of the issue, please visit the Cambridge University Reprint Order Center online at: [www.sheridan.com/cup/eoc](http://www.sheridan.com/cup/eoc)

- If you have problems with the file please email

**iceproduction@cambridge.org**

Please note that this pdf is for proof checking purposes only. It should not be distributed to third parties and may not represent the final published version.

**Important:** you must return any forms included with your proof. We cannot publish your article if you have not returned your signed copyright form

**Please do not reply to this email**

NOTE - for further information about **Journals Production** please consult our **FAQs** at [http://journals.cambridge.org/production\\_faqs](http://journals.cambridge.org/production_faqs)

# QUERIES

AQ1: To accommodate published reference citations and indexing, you may wish to add the middle initials for all authors in the byline.

AQ2: The distinction between surnames can be ambiguous, therefore to ensure accurate tagging for indexing purposes online (e.g. for PubMed entries), please check that the highlighted surnames have been correctly identified, that all names are in the correct order and spelt correctly.

AQ3: Please check that affiliations of all the authors and the corresponding author details are correctly set.

AQ4: Please add the author's middle initial to the running head and byline per journal style.

AQ5: Please provide the acknowledgment text.

## Letter to the Editor

# 1 Clinical characteristics and persistence of severe acute respiratory 2 coronavirus virus 2 (SARS-CoV-2) IgG antibodies in 4,607 French A Q1 healthcare workers: Comparison with European countries

4 Chantal Delmas MD<sup>1</sup>, Genevieve Plu-Bureau MD, PhD<sup>2</sup>, Etienne Canoui MD<sup>3</sup>, Luc Mouthon MD, PhD<sup>4</sup> and  
A Q2 Jean-Francois Meritet MD<sup>5</sup>

A Q3 <sup>1</sup>Occupational Health Department, GH Paris Centre – Cochin, APHP, France, <sup>2</sup>Epopée Team Inserm U1153 and Medical Gynecology Unit, GH Paris Centre – Cochin  
7 APHP, University of Paris, Paris, France, <sup>3</sup>Antimicrobial Stewardship Team, GH Paris Centre – Cochin, APHP, Paris, France, <sup>4</sup>Internal Medicine Department, GH  
8 Paris Centre – Cochin, APHP, University of Paris, Paris, France and <sup>5</sup>Virology Department, GH Paris Centre – Cochin APHP, Paris France

9 *To the Editor*—The safety of healthcare workers (HCWs) is a  
10 major challenge for healthcare systems. In the course of a severe  
11 acute respiratory coronavirus virus 2 (SARS-CoV-2) infection,  
12 immunoglobulin G (IgG) antibodies may be detected after a  
13 median of 14–24 days (interquartile range [IQR], 10–18) after  
14 onset of symptoms.<sup>1</sup>

15 In France, the coronavirus disease 2019 (COVID-19) pandemic  
16 reached a peak on April 7, 2020. HCWs had mobility and flexibility  
17 inside the Paris Center university hospital, where there was a  
18 cluster in the pandemic. We investigated the prevalence of IgG  
19 antibodies against SARS-CoV-2 among all HCWs in this hospital.  
20 We also sought to determine the correlation between RT-PCR test  
21 and serology and to compare our seroprevalence with that of other  
22 European countries.

23 From May 14, 2020, to June 17, 2020, all HCWs were asked  
24 by the occupational health department to participate in serologic  
25 screening. The Abbott-Architect test (Abbott Laboratories, Abbott  
26 Park, IL) was used to detect IgG anti-SARS-CoV-2. During blood  
27 sampling, clinical information was recorded using a standardized  
28 self-questionnaire on presented symptoms, comorbidities, and the  
29 reverse-transcriptase polymerase chain reaction (RT-PCR) test if  
30 one had been previously performed. Blood samples were collected  
31 >28 days after the first symptoms from those who were  
32 symptomatic.

33 The seroprevalence and 95% confidence interval were esti-  
34 mated using the Fisher exact method. The *t* test and the  $\chi^2$  test  
35 were performed to compare quantitative and qualitative variables,  
36 respectively. Simple and multivariate logistic regressions were  
37 performed to assess risk and symptoms associated with seropre-  
38 valence respectively. Statistical analyses were performed using  
39 SAS software (SAS Institute, Cary, NC). The local institutional  
40 review board approved this study. All subjects participated volun-  
41 tarily under pseudonyms.

**Author for correspondence:** Chantal Delmas, E-mail address: [chantal.delmas@aphp.fr](mailto:chantal.delmas@aphp.fr)

**Cite this article:** Delmas C, *et al.* (2020). Clinical characteristics and persistence of severe acute respiratory coronavirus virus 2 (SARS-CoV-2) IgG antibodies in 4,607 French healthcare workers: Comparison with European countries. *Infection Control & Hospital Epidemiology*, <https://doi.org/10.1017/ice.2020.1309>

Of 5,021 workers present during the study period, 4,607 42  
(91.8%) were included in the study. The mean age was 41.8 years 43  
(SD, 12.6), and 75% were female. Furthermore, 45% were para- 44  
medical staff members, 36% were physicians (including medical 45  
students), and 19% were in administrative and other professions. 46

Overall, the prevalence of IgG antibodies was 11.5% (95% 47  
confidence interval [CI], 10.6–12.4), and it was significantly higher 48  
(ie, 13%) for paramedical staff ( $P = .04$ ). Age and gender did not 49  
differ significantly according to seroprevalence. Furthermore, 50  
5 clinical symptoms were independently associated with positive 51  
serology: asthenia, fever, myalgia, ageusia, and anosmia, for which 52  
the highest odd ratio (OR) was observed (OR, 11.1; 95% CI, 53  
7.4–16.6). Notably, although anosmia appeared to be the most spe- 54  
cific factor, 64.3% of subjects with antibodies did not experience 55  
this symptom. The proportion of asymptomatic subjects with a 56  
positive serology was 21.4%. When considering comorbidities, 57  
positive serology was significantly associated with a lesser preva- 58  
lence in smokers (OR, 0.41; 95% CI, 0.29–0.58) and a higher preva- 59  
lence of diabetes (OR, 1.78; 95% CI, 1.04–3.03).<sup>1</sup> 60

### Discordance between RT-PCR and serology 61

In our study, 19.4% of the study participants had had a RT-PCR. 62  
Among individuals with negative a RT-PCR, 51 of 662 (7.7%) 63  
had detectable SARS-CoV-2 antibodies, whereas 29 of 233 64  
(12.4%) of RT-PCR-positive participants also had no detectable 65  
antibodies. The former result could be explained either by difficul- 66  
ties implementing RT-PCR tests or by the delay between the time of 67  
the test and the effective date of infection. For the latter finding, in 68  
addition to participants who did not develop antibodies, the time lag 69  
between PCR and serology should be mentioned (mean, 64.0 days), 70  
which implies that the serology is often realized long after the IgG 71  
peak. Indeed, the mean of antibody prevalence in this group 72  
( $0.28 \pm 0.32$ ) was higher than in the negative RT-PCR group 73  
( $0.05 \pm 0.08$ ;  $P < .001$ ). More generally, this group with positive 74  
RT-PCR and negative antibody tests had specific characteristics: 75  
younger age ( $38.3 \pm 12.8$  vs  $43.3 \pm 12.4$ ;  $P = .04$ ), more likely a smoker 76  
(31.0% vs 7.4%;  $P < 10^{-4}$ ), and male (37.9% vs 18.1%; 77  
 $P = .01$ ) compared with those with positive RT-PCR and positive 78  
serology tests.<sup>1</sup> 79

**Table 1.** Comparison of Seroprevalence IgG in European Countries

| Country, First Author               | No. of Participants | Prevalence % | 95% CI    | Date of Blood Test | Population Type                   |
|-------------------------------------|---------------------|--------------|-----------|--------------------|-----------------------------------|
| Belgium, Blairon <sup>6</sup>       | 1,494               | 1.6          | NA        | May 25–June 19     | 4 public hospitals                |
| Belgium, Martin <sup>7</sup>        | 326                 | 11.0         | NA        | April 15– May 18   | CHU Saint Pierre, Brussels        |
| UK, Bampoe <sup>3</sup>             | 200                 | 14.5         | 9.9–20.1  | May 11–June 5      | Maternity, London                 |
| Germany, Korth <sup>2</sup>         | 316                 | 1.6          | NA        | March 25– April 21 | Essen Hospital, tertiary-care     |
| Germany, Lackermair <sup>9</sup>    | 151                 | 2.6          | 0.8–7.1   | April 2–6          | Outpatient center, Dachau         |
| Germany, Schmidt <sup>1</sup>       | 385                 | 2.9          | NA        | April 20–30        | Neurologic clinic                 |
| Spain, Garcia-Basteiro <sup>4</sup> | 578                 | 7.6          | NA        | March 28–April 9   | Hospital reference, Barcelona     |
| Denmark, Iversen <sup>8</sup>       | 28,792              | 2.7          | 2.5–2.9   | April 15–23        | Capital region                    |
| France, Delmas <sup>a</sup>         | 4,607               | 11.5         | 10.6–12.4 | May 14–June 17     | Paris Center, university hospital |

Note. CI, confidence interval.

<sup>a</sup>Present study.

## 80 Comparison with European countries

81 In our literature review, we retained only studies with IgG antibody  
82 testing; we excluded those with IgA or IgM serologies. The 11.5%  
83 prevalence of IgG in our HCWs is similar to the reported prevalences  
84 in Belgium or the United Kingdom (Table 1). Different protective  
85 measures, date of blood screening, and/or population structure in  
86 each country could explain the variation in IgG serology from  
87 1.6% reported by Korth *et al*<sup>2</sup> up to 14.5% reported by Bampoe  
88 *et al*.<sup>3</sup> In our hospital, masks are compulsory, and protective equip-  
89 ment has been available since March 17.

90 Of 233 HCWs, 29 (12.4%) were RT-PCR positive with no  
91 detectable antibodies. This result parallels that of Garcia-Basteiro  
92 *et al*,<sup>4</sup> who also reported 15% of individuals with positive  
93 RT-PCR and negative serology. A recent study by Patel *et al*<sup>5</sup> showed  
94 the possibility of decreased antibodies over 60 days, which implies  
95 transiently detectable antibodies.

96 Our study has some limitations. During the lockdown period,  
97 some HCWs were isolated at home on a case-by-case basis for  
98 reasons of severe personal or familial comorbidities. RT-PCR swab  
99 tests were conducted at the time of suspected illness only in symp-  
100 tomatic or in individuals who had had contact with COVID-19  
101 patients. Thus, 902 of 4,607 (19.6%) had this test at the time of  
102 onset of symptoms.

103 The detection of asymptomatic cases by RT-PCR is essential  
104 to isolating or avoiding quarantine of HCWs to prevent risk of  
105 contamination for vulnerable patients and to reduce the risk of  
106 interprofessional staff-to-staff transmission.

107 To limit virus transmission, we emphasize the necessity of  
108 large-scale screening for exposed HCWs, even those who do not  
109 present any symptoms. Further investigations are needed to  
110 explore negative serology in subjects with positive RT-PCR for  
111 understanding population immunity and the potential risks of  
112 reinfection and disease in HCWs.

113 **Supplementary material.** To view supplementary material for this article,  
114 please visit <https://doi.org/10.1017/ice.2020.1309>

## Acknowledgments.

**Financial support.** No financial support was provided relevant to this article. 116

**Conflicts of interest.** Luc Mouthon reports nonfinancial support from Grifols 117  
and Octapharma as well as a grant from LFB and personal fees from Actellion 118  
and J&J outside this work. All other authors report no conflicts of interest 119  
relevant to this article. 120

## References

- Schmidt SB, Gruter L, Boltzmann M, Rollnik JD Prevalence of serum IgG 122  
antibodies against SARS-CoV-2 among clinic staff. *PLoS One* 2020;15(6). 123  
doi: [10.1371/journal.pone.0235417](https://doi.org/10.1371/journal.pone.0235417). 124
- Korth J, Wilde B, Dolff S, *et al*. SARS-CoV-2-specific antibody detection in 125  
healthcare workers in Germany with direct contact to COVID-19 patients. 126  
*J Clin Virol* 2020;128:104437. 127
- Bampoe S, Lucas DN, Neall G, *et al*. A cross-sectional study of immune sero- 128  
conversion to SARS-CoV-2 in frontline maternity health professionals. 129  
*Anaesthesia* 2020. doi: [10.1111/anae.15229](https://doi.org/10.1111/anae.15229). 130
- Garcia-Basteiro AL, Moncunill G, Tortajada M, *et al*. Seroprevalence of anti- 131  
bodies against SARS-CoV-2 among healthcare workers in a large Spanish 132  
reference hospital. *Nat Comm* 2020;11. doi: [10.1038/s41467-020-17318-x](https://doi.org/10.1038/s41467-020-17318-x). 133
- Patel MM, Thornsburg NJ, Stubblefield WB, *et al*. Change in antibodies to 134  
SARS-CoV-2 over 60 days among healthcare personnel in Nashville, 135  
Tennessee. *JAMA Network* 2020. doi: [10.1001/jama.2020.18796](https://doi.org/10.1001/jama.2020.18796). 136
- Blairon L, Mokrane S, Wilmet A, Desilly G, *et al*. Large-scale, molecular, and 137  
serological SARS-CoV-2 screening of healthcare workers in a 4-site public 138  
hospital in Belgium after COVID-19 outbreak. *J Infect* 2020. doi: [10.1016/ 139  
j.jinf.2020.07.033](https://doi.org/10.1016/j.jinf.2020.07.033). 140
- Martin C, Montesinos I, Dauby N, *et al*. Dynamics of SARS-CoV-2 RT-PCR 141  
positivity and seroprevalence among high-risk healthcare workers and hos- 142  
pital staff. *J Hosp Infect* 2020. doi: [10.1016/j.jhin.2020.06.028](https://doi.org/10.1016/j.jhin.2020.06.028). 143
- Iversen K, Bundgaard H, Hasselbalch RM, *et al*. Risk of COVID-19 in health- 144  
care workers in Denmark: an observational cohort study. *Lancet* 2020. doi: 145  
[10.1016/S1473-3099\(20\)30589-2](https://doi.org/10.1016/S1473-3099(20)30589-2). 146
- Lackermair K, William F, Grzanna N, *et al*. Infection with SARS-CoV-2 in 147  
primary care healthcare workers assessed by antibody testing. *Fam Pract* 148  
2020. doi: [10.1093/fampra/cmz078](https://doi.org/10.1093/fampra/cmz078). 149

AQ5
